# Supplementary material
Source: PubMed Central journal article supplement (PMC7455167)

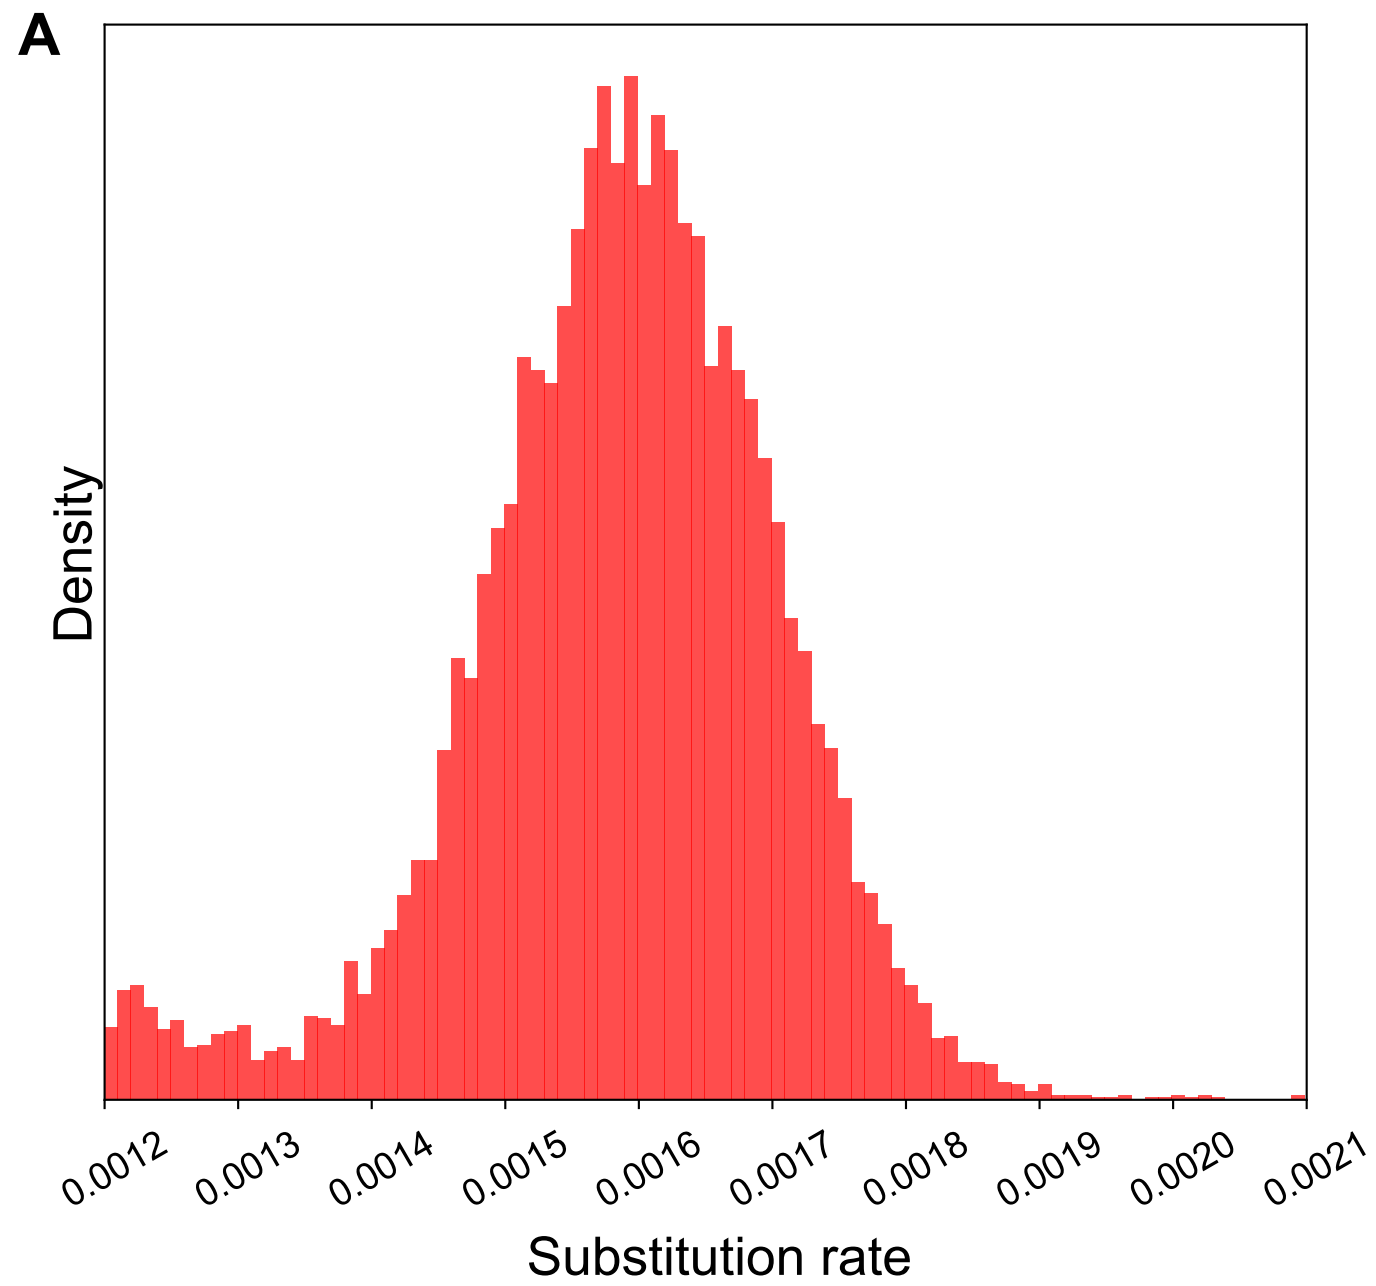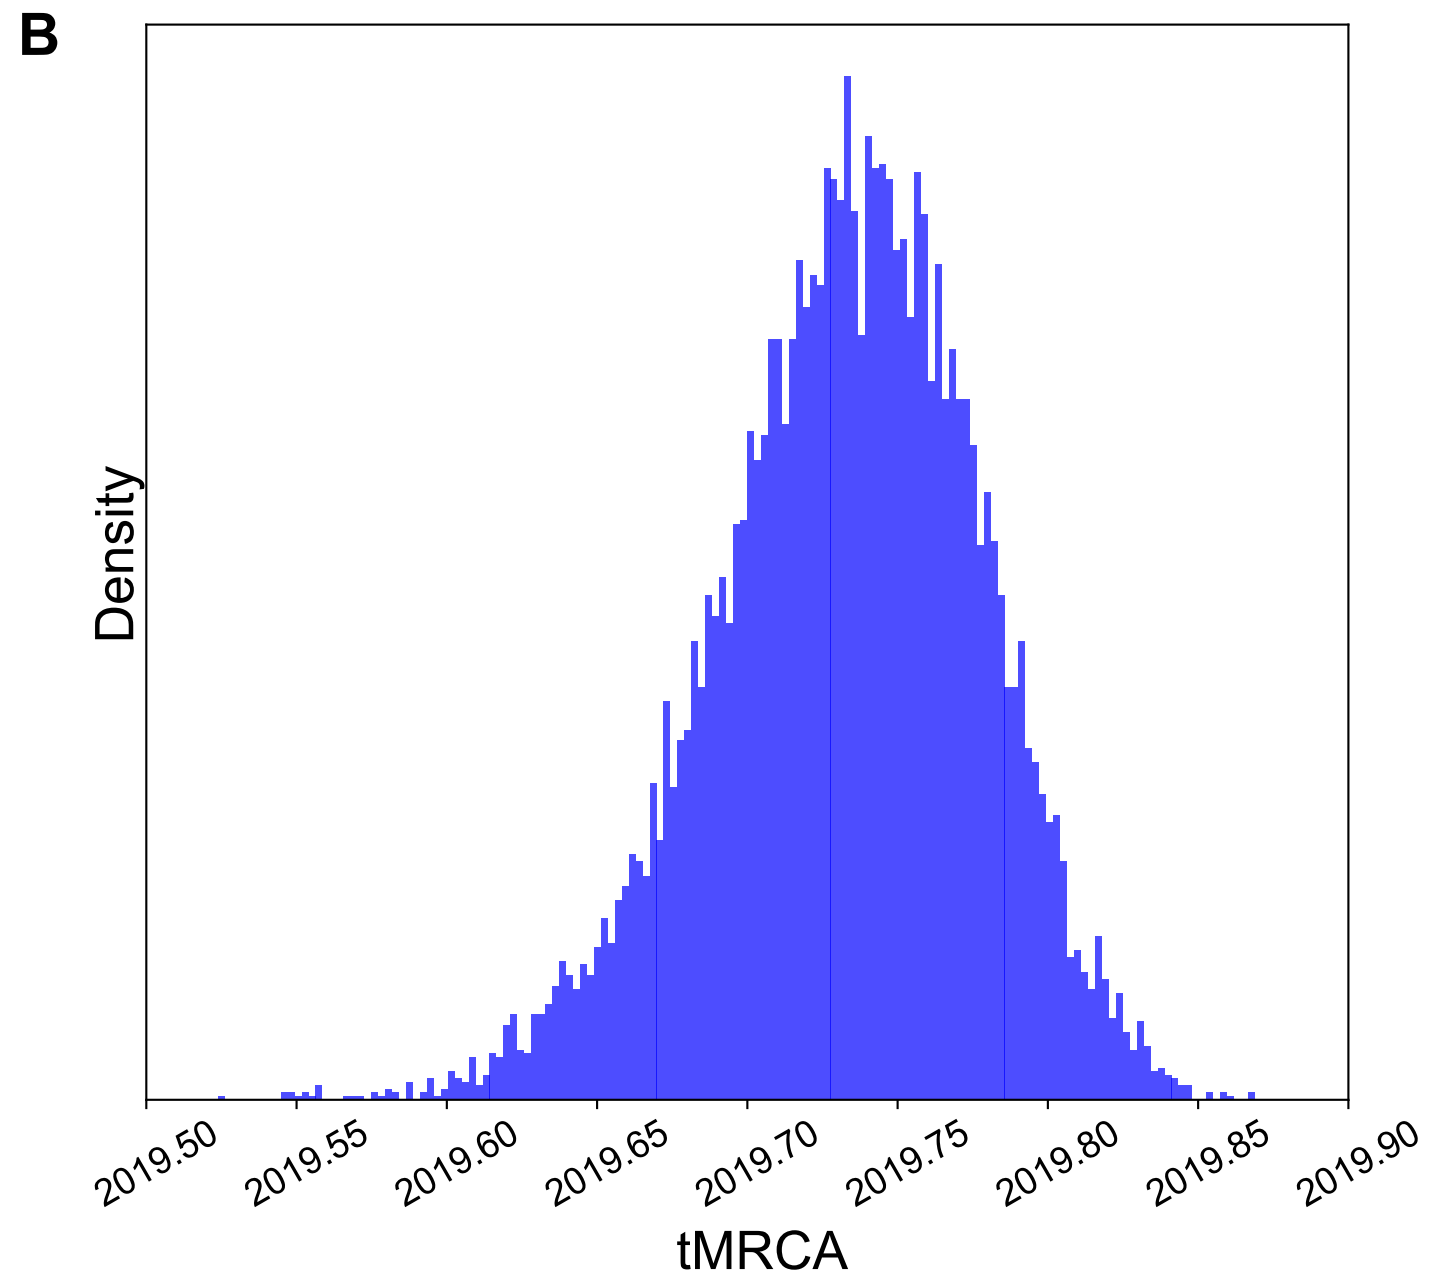

Supplement: mmc4.pdf [file mmc4.pdf]
